# Supplementary material for: Detection of Cryptosporidium parvum and Cyclospora cayetanensis infections among people living in a slum area in Kathmandu valley, Nepal
Source: PubMed Central journal article supplement (PMC5590164; doi:10.1186/s13104-017-2779-2), 2017-09-07
Supplement: 13104_2017_2779_MOESM1_ESM.pdf [file 13104_2017_2779_MOESM1_ESM.pdf]

**Study of *Cryptosporidium parvum* and *Cyclospora cayetanensis* infections among people living in Thapathali slum area, Kathmandu, Nepal**

Study ID: [ ][ ][ ]

Date Today: [D][D]-[M][M]-[Y][Y]

Name of the respondent: [.....]

Mobile no of respondent: [.....]

**DEMOGRAPHIC DETAILS**

1. Name: [.....]

2. Sex: M [ ] / F [ ]

3. Age in Years: [ ][ ]

**SOCIOECONOMIC STATUS**

4. Occupation:

1=Students [ ]

2=Farmer [ ]

3=Factory worker [ ]

4= Others [ ]

5. Education:

Illiterate [ ]

Literate [ ]

6. Number of People in the household: [ ]

7. Water source:

1=Tap [ ]

2= Tanker [ ]

3= Bottle [ ]

## LAB REPORT

### 8. Protozoal parasites:

*Giardia lamblia*

*Entamoeba coli*

*Entamoeba histolytica*

*Cyclospora cayetanensis*

*Cryptosporidium parvum*

*Sarcosystis hominis*

*Isoospora belli*

*Edolimax nana*

*Blastocystis hominis*

### 9. Helminthic parasites:

*Ascaris lumbricoides*

*Hymenolepis nana*

*Trichuris trichiura*

*Hymenolepis diminuta*

*Taenia spp*

Hookworm
