# Supplementary material for: Detection of Cryptosporidium parvum and Cyclospora cayetanensis infections among people living in a slum area in Kathmandu valley, Nepal
Source: PubMed Central journal article supplement (PMC5590164; doi:10.1186/s13104-017-2779-2), 2017-09-07
Supplement: 13104_2017_2779_MOESM3_ESM.pdf [file 13104_2017_2779_MOESM3_ESM.pdf]

## Codebook of dataset of “Detection of Cryptosporidium parvum and Cyclospora cayetanensis infections among people living in a slum area in Kathmandu valley, Nepal”

| Variables         | Labels            |
|-------------------|-------------------|
| <b>age_groups</b> | <b>age_groups</b> |

```

type: string (str10)

unique values: 2                               missing "": 0/262

tabulation: Freq. Value
              198 "<15 years"
              64  ">=15 years"

warning: variable has embedded blanks

```

| Text                   |                        |
|------------------------|------------------------|
| <b>household_group</b> | <b>household_group</b> |

```

type: string (str12)

unique values: 3                               missing "": 0/262

tabulation: Freq. Value
              53 "1-3 members"
              135 "4-7 members"
              74 "8-11 members"

warning: variable has embedded blanks

```

|                  |                  |
|------------------|------------------|
| <b>education</b> | <b>education</b> |
|------------------|------------------|

```

type: string (str10)

unique values: 2                               missing "": 0/262

tabulation: Freq. Value
              114 "Illiterate"
              148 "Literate"

```

|                     |                     |
|---------------------|---------------------|
| <b>water_source</b> | <b>water_source</b> |
|---------------------|---------------------|

```

type: string (str6)

unique values: 3                               missing "": 0/262

tabulation: Freq. Value
              71 "bottle"
              102 "tank"

```

89 "tap"

---

occupation

occupation

---

type: string (str14)  
unique values: 4 missing "": 0/262  
tabulation: Freq. Value  
47 "factory\_worker"  
32 "farmer"  
20 "others"  
163 "student"

---

no\_house\_members

no\_house\_members

---

type: numeric (byte)  
range: [2,11] units: 1  
unique values: 10 missing .: 0/262  
mean: 5.70229  
std. dev: 2.31998  
percentiles: 10% 25% 50% 75% 90%  
3 4 5 8 9

---

Entamoeba\_coli

Entamoeba\_coli

---

type: string (str12)  
unique values: 2 missing "": 0/262  
tabulation: Freq. Value  
11 "detected"  
251 "not detected"  
warning: variable has embedded blanks

---

Entamoeba\_histolytica

Entamoeba\_histolytica

---

type: string (str12)  
unique values: 2 missing "": 0/262

```
tabulation: Freq. Value
             10 "detected"
            252 "not detected"
```

warning: variable has embedded blanks

---

**Giardia\_lamblia**

**Giardia\_lamblia**

---

type: string (str12)

unique values: 2 missing "": 0/262

```
tabulation: Freq. Value
             20 "detected"
            242 "not detected"
```

warning: variable has embedded blanks

---

**Cyclospora\_cayetanensis**

**Cyclospora\_cayetanensis**

---

type: string (str12)

unique values: 2 missing "": 0/262

```
tabulation: Freq. Value
             10 "detected"
            252 "not detected"
```

warning: variable has embedded blanks

---

**Cryptosporidium\_parvum**

**Cryptosporidium\_parvum**

---

type: string (str12)

unique values: 2 missing "": 0/262

```
tabulation: Freq. Value
             4 "detected"
            258 "not detected"
```

warning: variable has embedded blanks

---

**Hymenolepsis\_nana**

**Hymenolepsis\_nana**

---

type: string (str12)

unique values: 2 missing "": 0/262

tabulation: Freq. Value  
4 "detected"  
258 "not detected"

warning: variable has embedded blanks

---

**Hymenolepis\_diminuta**

**Hymenolepis\_diminuta**

---

type: string (str12)

unique values: 2 missing "": 0/262

tabulation: Freq. Value  
1 "detected"  
261 "not detected"

warning: variable has embedded blanks

---

**Trichuris\_trichiura**

**Trichuris\_trichiura**

---

type: string (str12)

unique values: 2 missing "": 0/262

tabulation: Freq. Value  
2 "detected"  
260 "not detected"

warning: variable has embedded blanks

---

**Ascaris\_lumbricoides**

**Ascaris\_lumbricoides**

---

type: string (str12)

unique values: 2 missing "": 0/262

tabulation: Freq. Value  
8 "detected"  
254 "not detected"

warning: variable has embedded blanks

---

**Sarcosystis\_hominis**

**Sarcosystis\_hominis**

---

type: string (**str12**)  
unique values: 2 missing "": 0/262  
tabulation: Freq. Value  
          1 "detected"  
         261 "not detected"  
warning: variable has embedded blanks

---

**any\_parasite**

---

**any\_parasite**

---

type: string (**str12**)  
unique values: 2 missing "": 0/262  
tabulation: Freq. Value  
          71 "detected"  
         191 "not detected"  
warning: variable has embedded blanks

---

**protozoal\_parasite**

---

**protozoal\_parasite**

---

type: string (**str12**)  
unique values: 2 missing "": 0/262  
tabulation: Freq. Value  
          56 "detected"  
         206 "non detected"  
warning: variable has embedded blanks

---

**helmenthic\_parasite**

---

**helmenthic\_parasite**

---

type: string (**str12**)  
unique values: 2 missing "": 0/262  
tabulation: Freq. Value  
          15 "detected"  
         247 "non detected"  
warning: variable has embedded blanks
